# Supplementary material for: A fluorescence-activatable tumor-reporting probe for precise photodynamic therapy
Source: Royal Society of Chemistry journal article supplement (doi:10.1039/d1tb00704a), 2021-01-01
Supplement: d1tb00704a1.pdf [file d1tb00704a1.pdf]

## Supporting Information

### **A Fluorescence-activatable Tumor-reporting Probe for Precise Photodynamic Therapy**

Jian Li,<sup>a</sup> Tingting Wang,<sup>b</sup> Feng Jiang,<sup>a</sup> Zhangyong Hong,<sup>c</sup> Xinhui Su,<sup>b,\*</sup> Shuang Li,<sup>c,\*</sup> and Shoufa Han<sup>a,\*</sup>

*State Key Laboratory for Physical Chemistry of Solid Surfaces, Department of Chemical Biology, College of Chemistry and Chemical Engineering, the Key Laboratory for Chemical Biology of Fujian Province, The MOE Key Laboratory of Spectrochemical Analysis & Instrumentation, and Innovation Center for Cell Signaling Network, Xiamen University; Xiamen 361005, China. E-mail: shoufa@xmu.edu.cn  
Department of Nuclear Medicine, Zhongshan Hospital, Xiamen University, Xiamen 361004, China. E-mail: suxinhui@163.com*

*State Key Laboratory of Medicinal Chemical Biology, Tianjin Key Laboratory of Protein Sciences, College of Life Sciences, Nankai University, Tianjin 300071, P. R. China, E-mail: lishuang5258@163.com*

## Synthesis of compounds

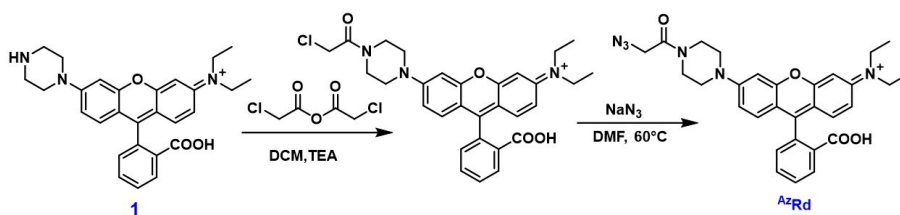

Scheme S1. Synthetic route for AzRd.

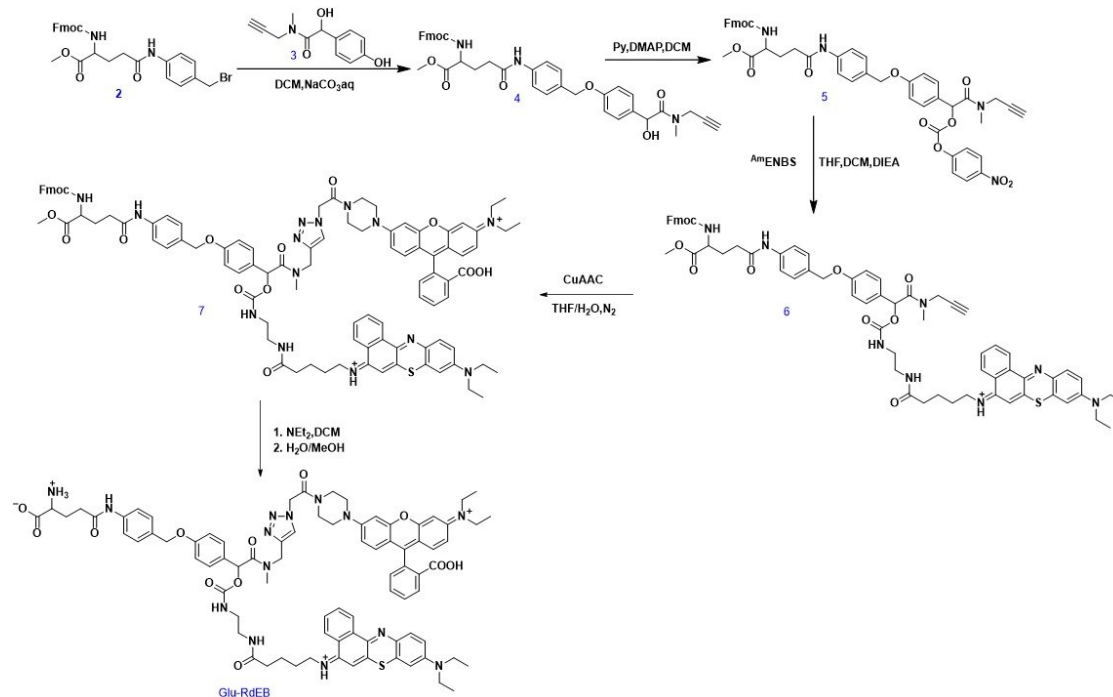

Scheme S2. Synthetic route for Glu-RdEB.

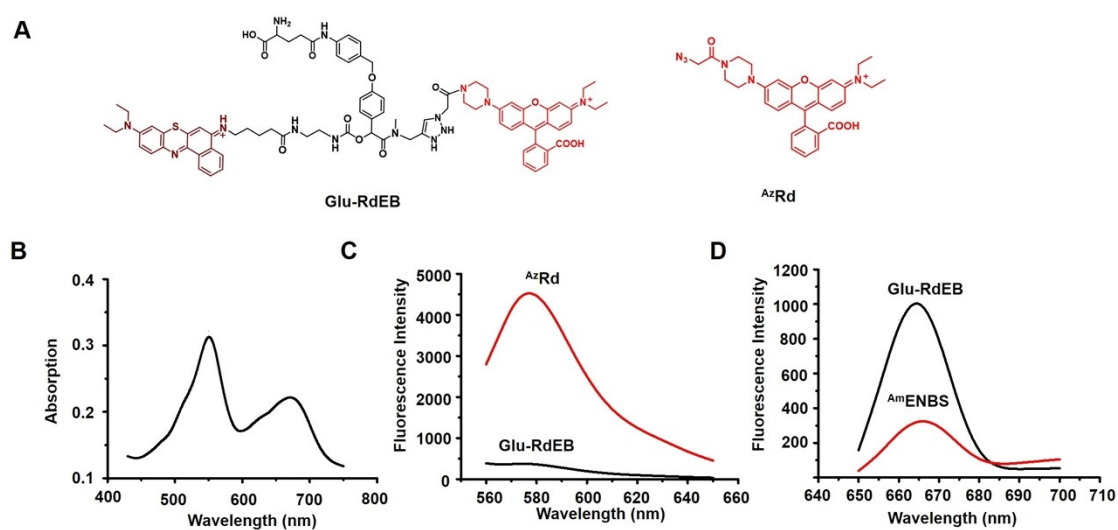

Fig. S1 Optical property of Glu-RdEB. (A) Chemical structures of Glu-RdEB and AzRd. (B) UV-Vis absorption of Glu-RdEB. (C) Rd fluorescence emission of Glu-RdEB (10  $\mu$ M), AzRd (10  $\mu$ M) in PBS (pH 7.4). The fluorescence emission

was measured using  $\lambda_{\text{ex}} = 540 \text{ nm}$ . (D) Rd fluorescence emission of Glu-RdEB ( $10 \mu\text{M}$ ),  $\text{AmENBS}$  ( $10 \mu\text{M}$ ) in sodium phosphate buffer (pH 7.4). The fluorescence emission was measured using  $\lambda_{\text{ex}} = 660 \text{ nm}$ .

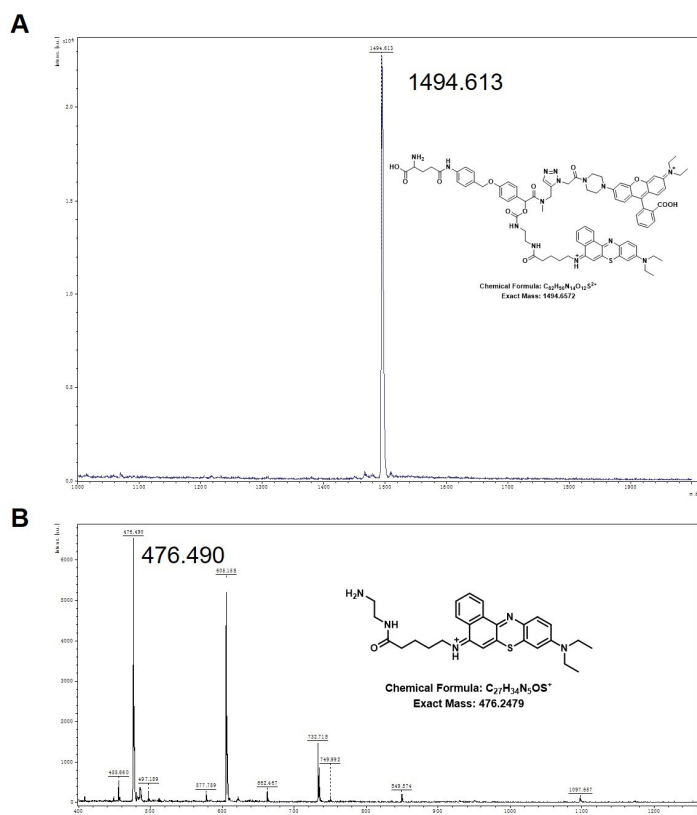

**Fig. S2** MALDI-TOFMS analysis of Glu-RdEB solution spiked with GGT. (A) MALDI-TOFMS of Glu-RdEB. (B) MALDI-TOFMS of GGT inactivation by Glu-RdEB, Glu-RdEB ( $10 \mu\text{M}$ ) was incubated for 16 h in PBS (pH 7.4) with GGT (80 Units) at  $37 \text{ }^\circ\text{C}$ .

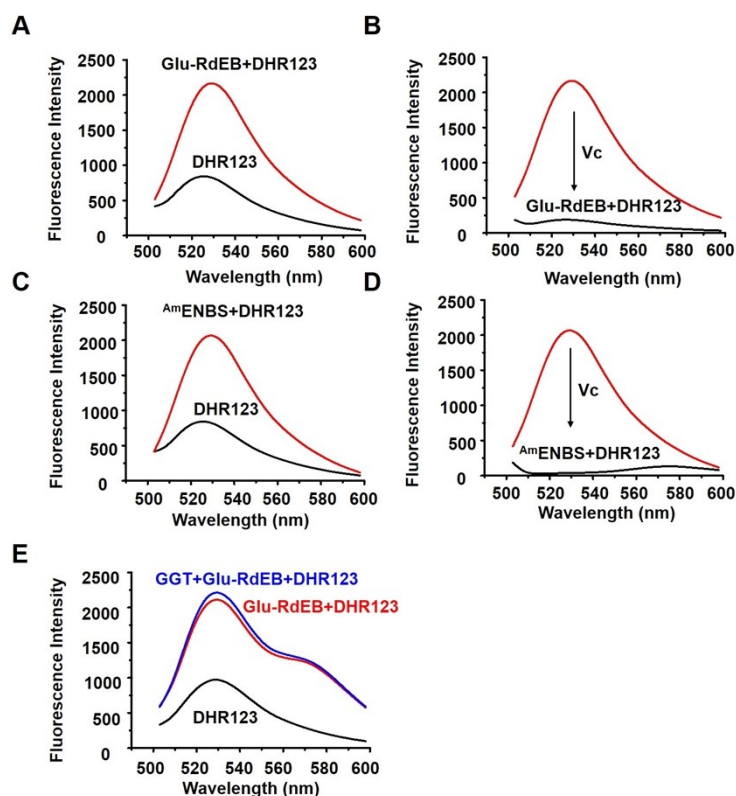

**Fig. S3** Fluorescence spectra for  $O_2^{\bullet-}$  using DHR123 as fluorescence probe. (A) The solution of Glu-RdEB ( $10 \mu\text{M}$ ) containing DHR 123 ( $10 \mu\text{M}$ ) were exposed to light illumination for 6 min before analysis for fluorescence emission. (B)  $O_2^{\bullet-}$  quenching experiment,  $0.5 \text{ mM}$  Vc was added to the above (Glu-RdEB+DHR123) aqueous solution before light irradiation. (C) The solution of  $^{\text{Am}}$ ENBS ( $10 \mu\text{M}$ ) containing DHR 123 ( $10 \mu\text{M}$ ) were exposed to light illumination for 6 min before analysis for fluorescence emission. (D)  $O_2^{\bullet-}$  quenching experiment,  $0.5 \text{ mM}$  Vc was added to the above ( $^{\text{Am}}$ ENBS+DHR123) aqueous solution before light irradiation. (E) The solutions of Glu-RdEB ( $10 \mu\text{M}$ ) containing DHR 123 ( $10 \mu\text{M}$ ) containing GGT ( $0$ , or  $80 \text{ units/L}$ ) were incubated for 16 h and then exposed to light illumination for 6 min before analysis for fluorescence emission. As control, DHR123 aqueous solution without photosensitizers was subjected to irradiation.

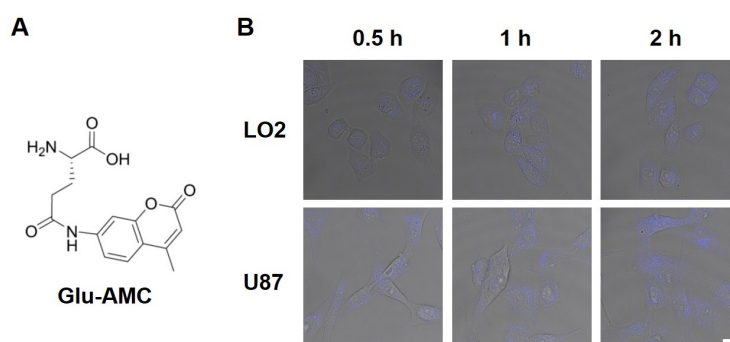

**Fig. S4** (A) The chemical structure of commercial fluorescence probe (AMC-Glu). (B) GGT activity detection of U87 and LO2 with AMC-Glu based on fluorescence imaging. LO2 cells and U87 cells are incubated with AMC-Glu ( $10 \mu\text{M}$ ) for 0.5, 1, 2 h. Scale bars:  $10 \mu\text{m}$ .

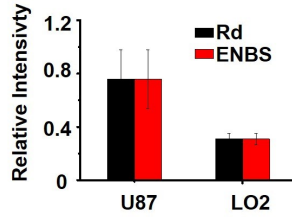

**Fig. S5** preferred probe uptake and turnover in U87 cells over LO2 cells. U87 cells and LO2 cells pre-labeled with blue or green fluorescein were cocultured in DMEM for 16 h and then exposed to Glu-RdEB (20  $\mu$ M) for 2 h before confocal microscopic analysis. The columns showed the intracellular rhodamine and ENBS fluorescence relative intensity (average of three areas) of U87 and LO2 cells in 3B.

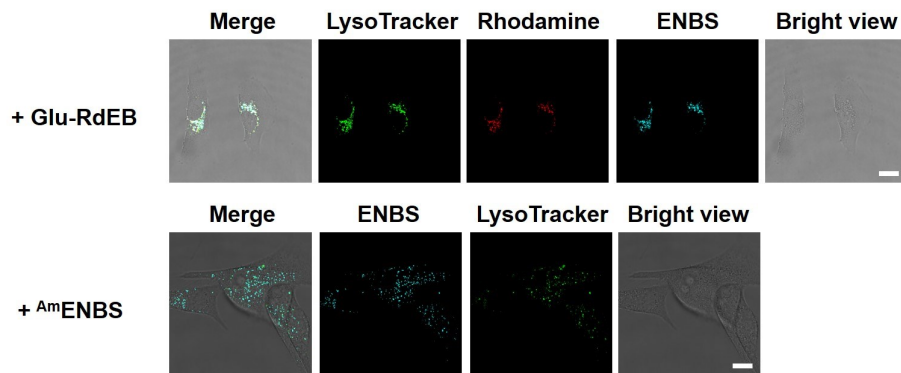

**Fig. S6** Subcellular location of Glu-RdEB and <sup>Am</sup>ENBS in live cells. U87 cells were incubated for 2 h with Glu-RdEB (10  $\mu$ M), <sup>Am</sup>ENBS (1  $\mu$ M), and then with LysoTracker Green DND 26 (1  $\mu$ M) for 30 min before confocal microscopic analysis. Scale bars: 10  $\mu$ m.

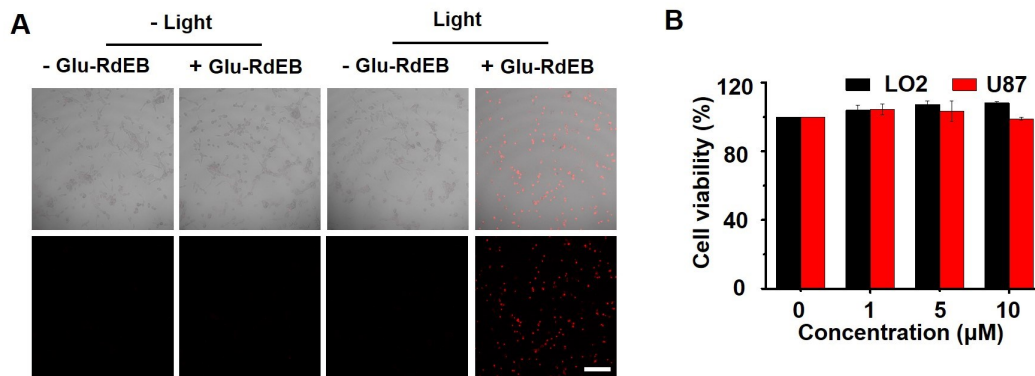

**Fig. S7** (A) Photo-induced cytotoxicity of Glu-RdEB. U87 cells were incubated with Glu-RdEB (0.4  $\mu$ M) for 2 h, then irradiate upon 660 nm light for 20 min, and then cultured in DMEM at 37  $^{\circ}$ C for 16 h, Dead cell staining assays using propidium iodide (20  $\mu$ M, 0.5 h) as fluorescence probes. ( $\lambda_{ex}$ : 552 nm). Scale bars: 100  $\mu$ m. (B) None dark toxicity of Glu-RdEB in live cell. U87 or LO2 cells were incubated with Glu-RdEB for 2 h, and then cell viability was determined by CCK-8 Kit.



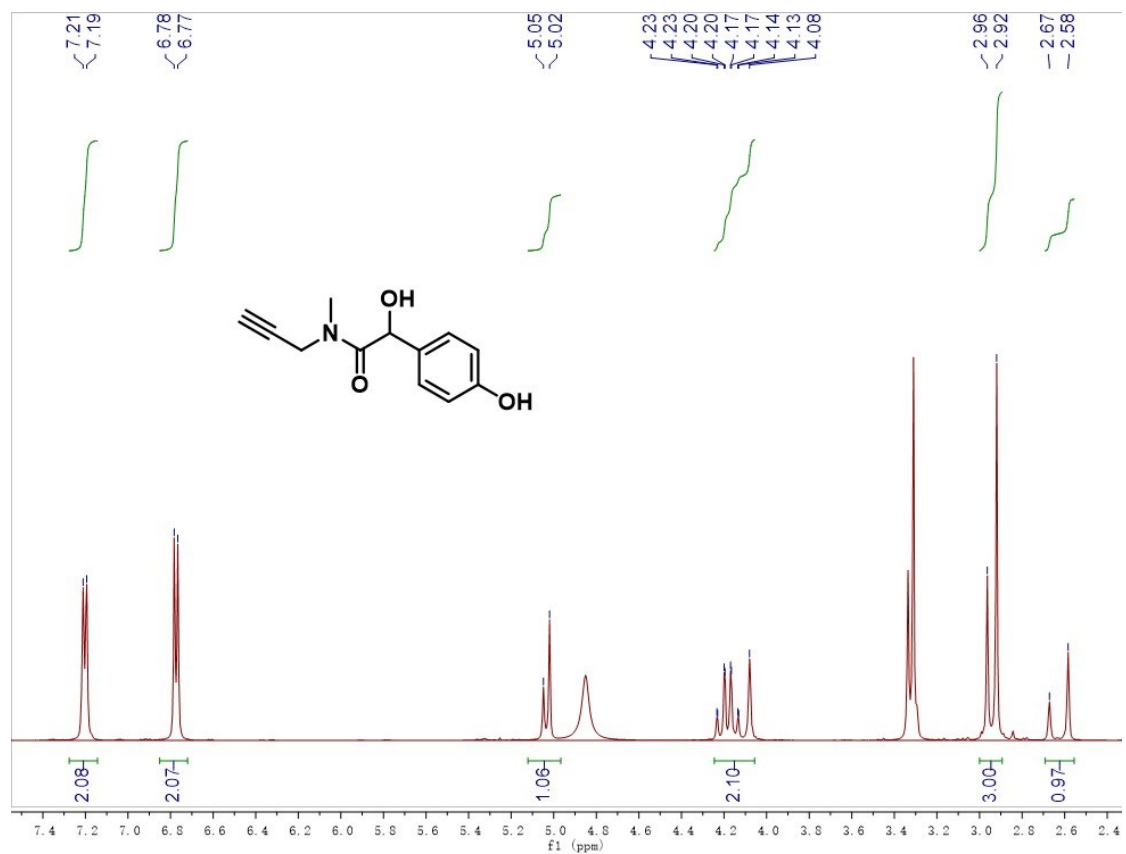

Fig. S10 <sup>1</sup>H-NMR Spectrum of compound 3.

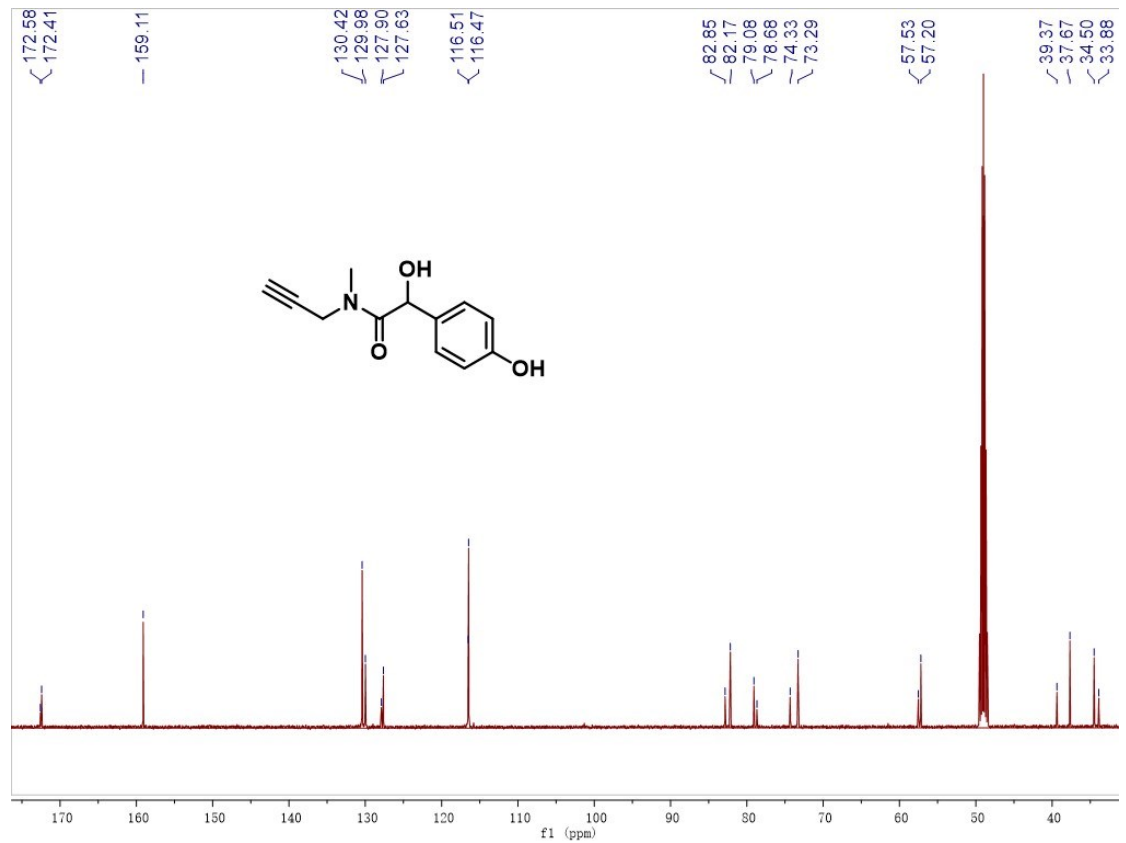

Fig. S11 <sup>13</sup>C-NMR Spectrum of compound 3.

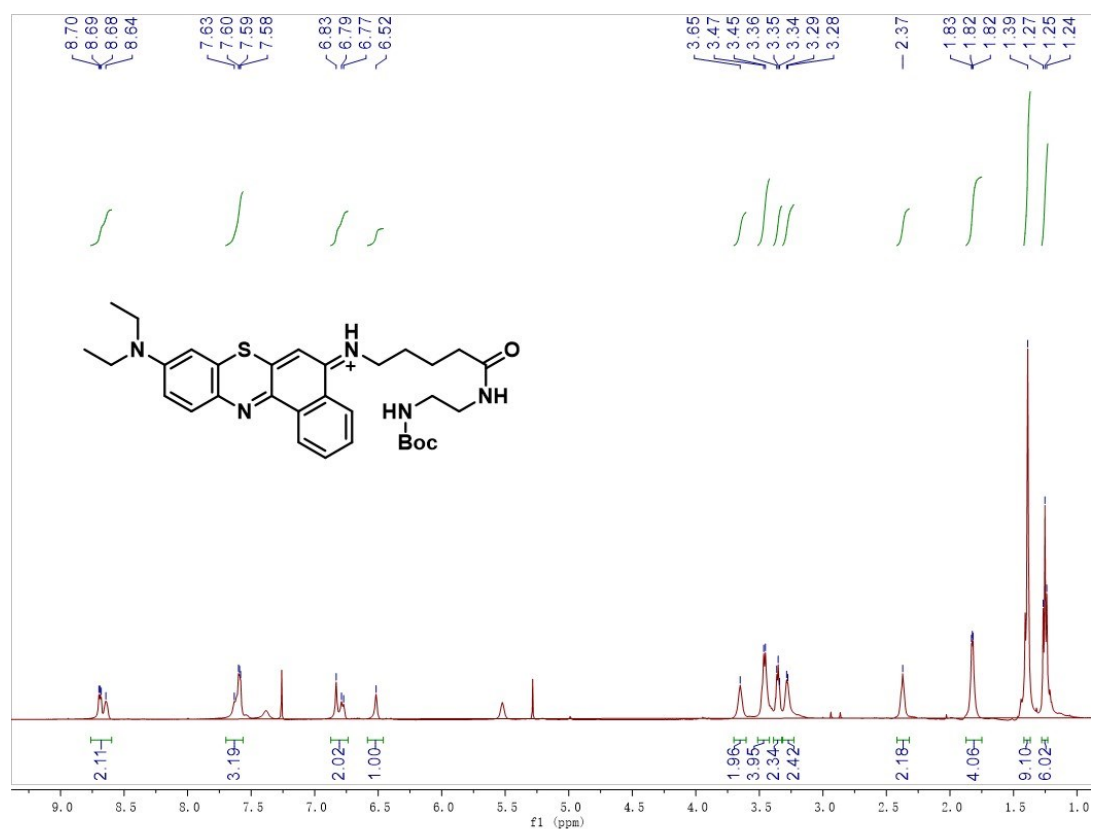

Fig. S12 <sup>1</sup>H-NMR Spectrum of AmENBS-Boc.

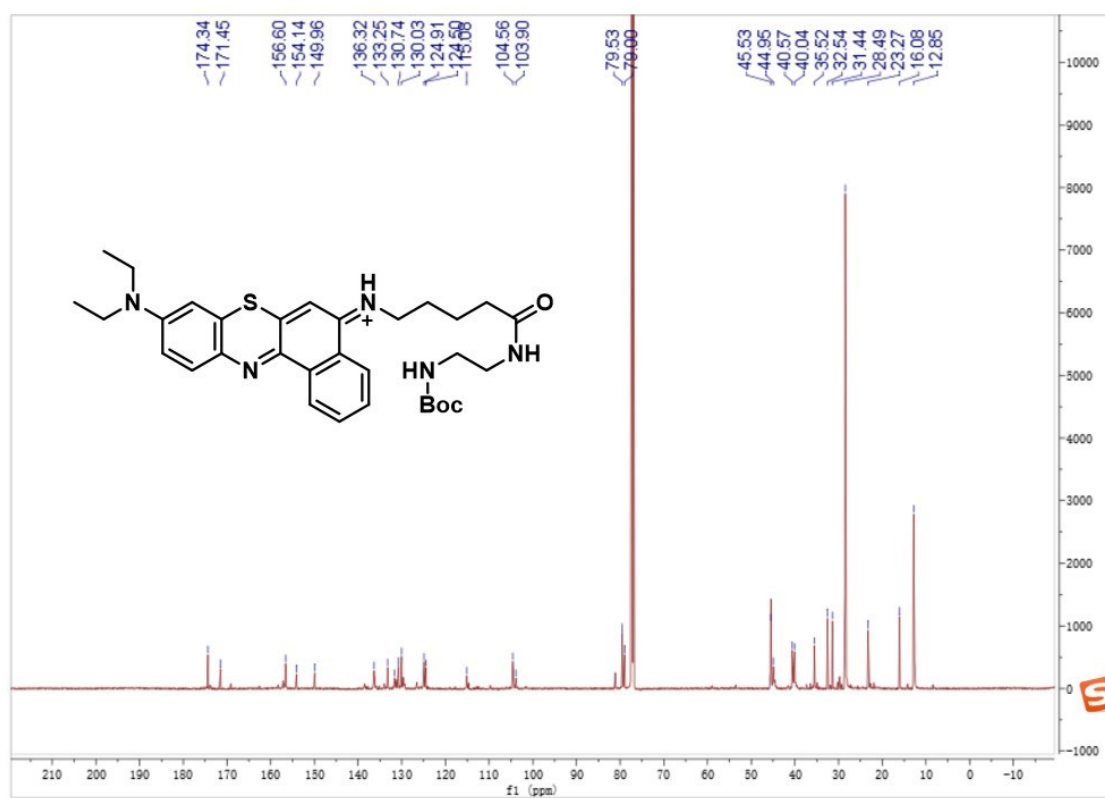

Fig. S13 <sup>13</sup>C-NMR Spectrum of AmENBS-Boc.



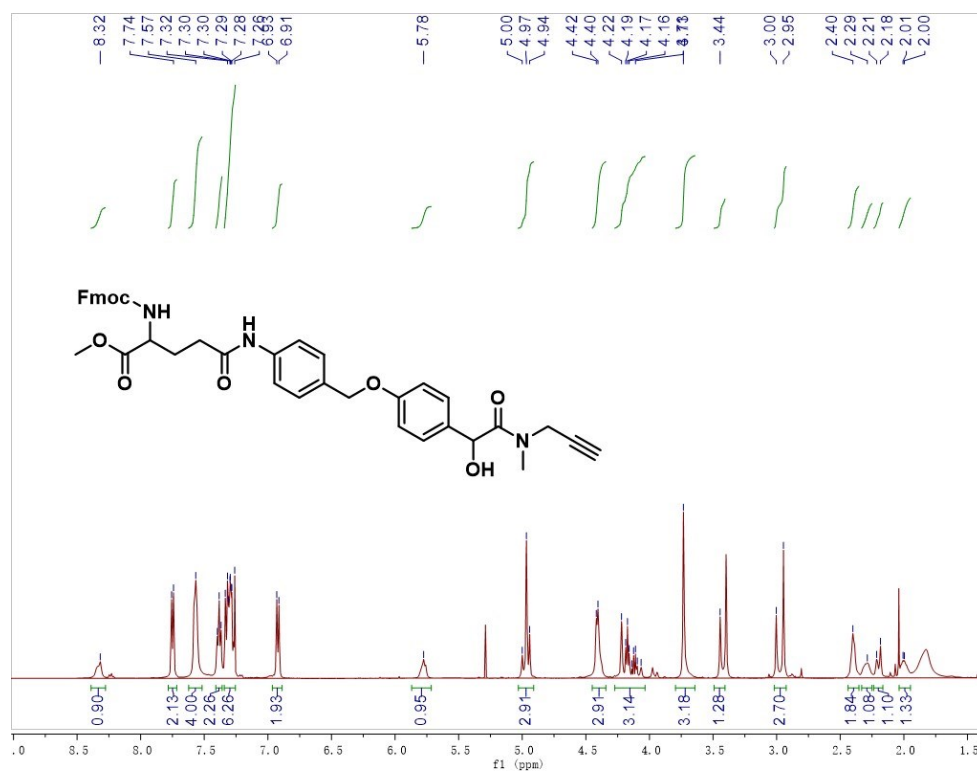

Fig. S14 <sup>1</sup>H-NMR Spectrum of compound 4.

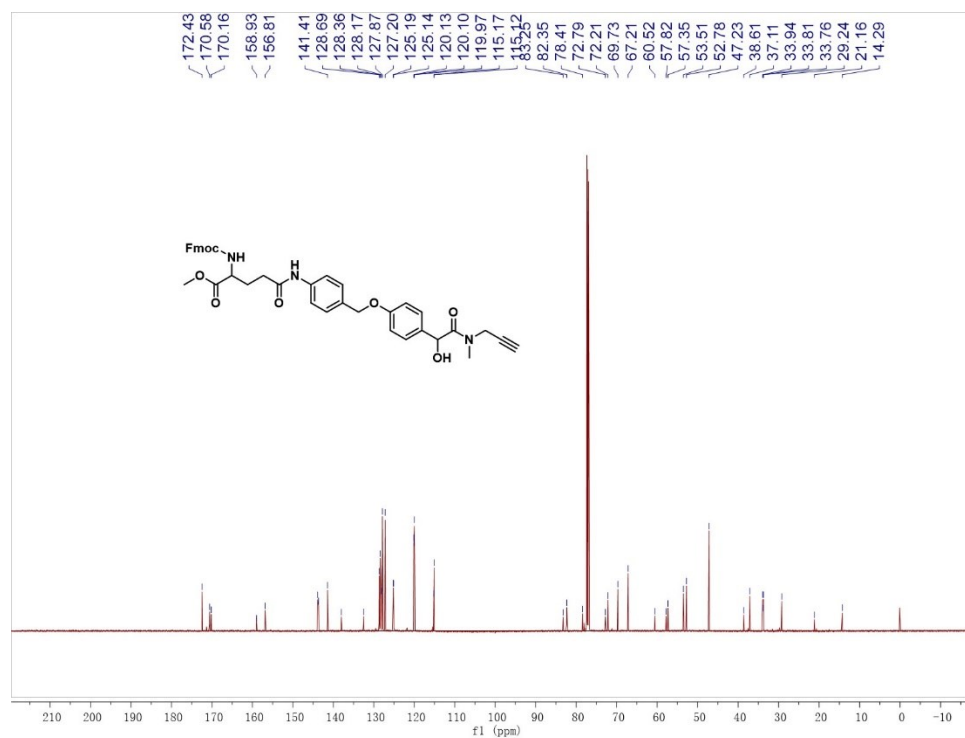

Fig. S15 <sup>13</sup>C-NMR Spectrum of compound 4.

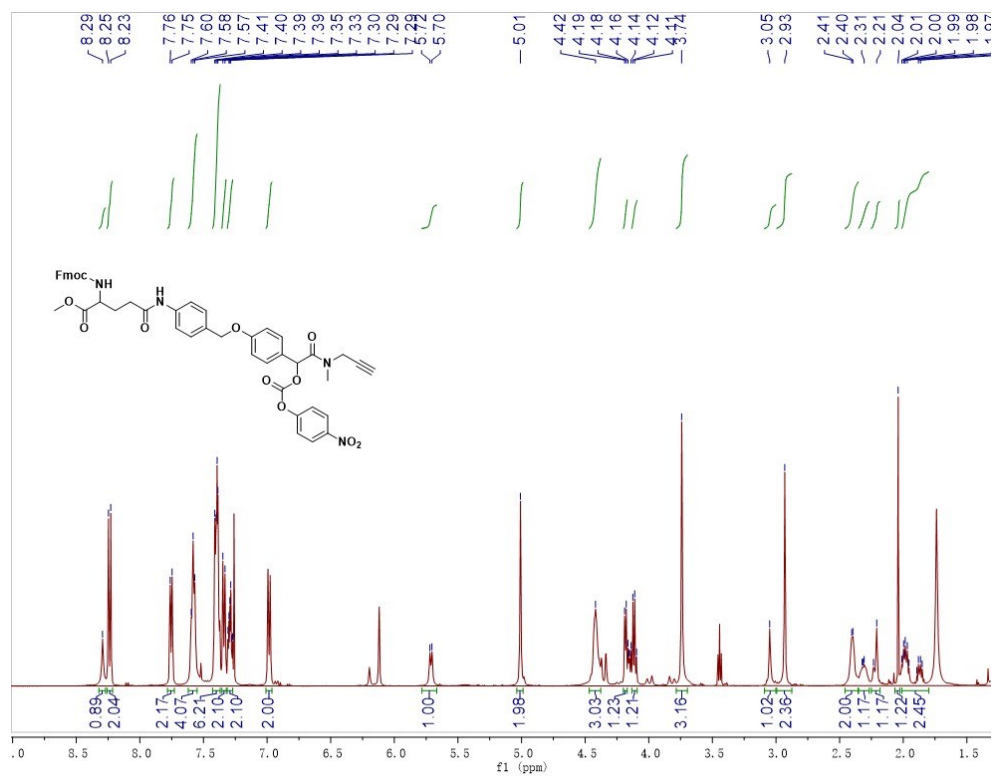

Fig. S16 <sup>1</sup>H-NMR Spectrum of compound compound 5.

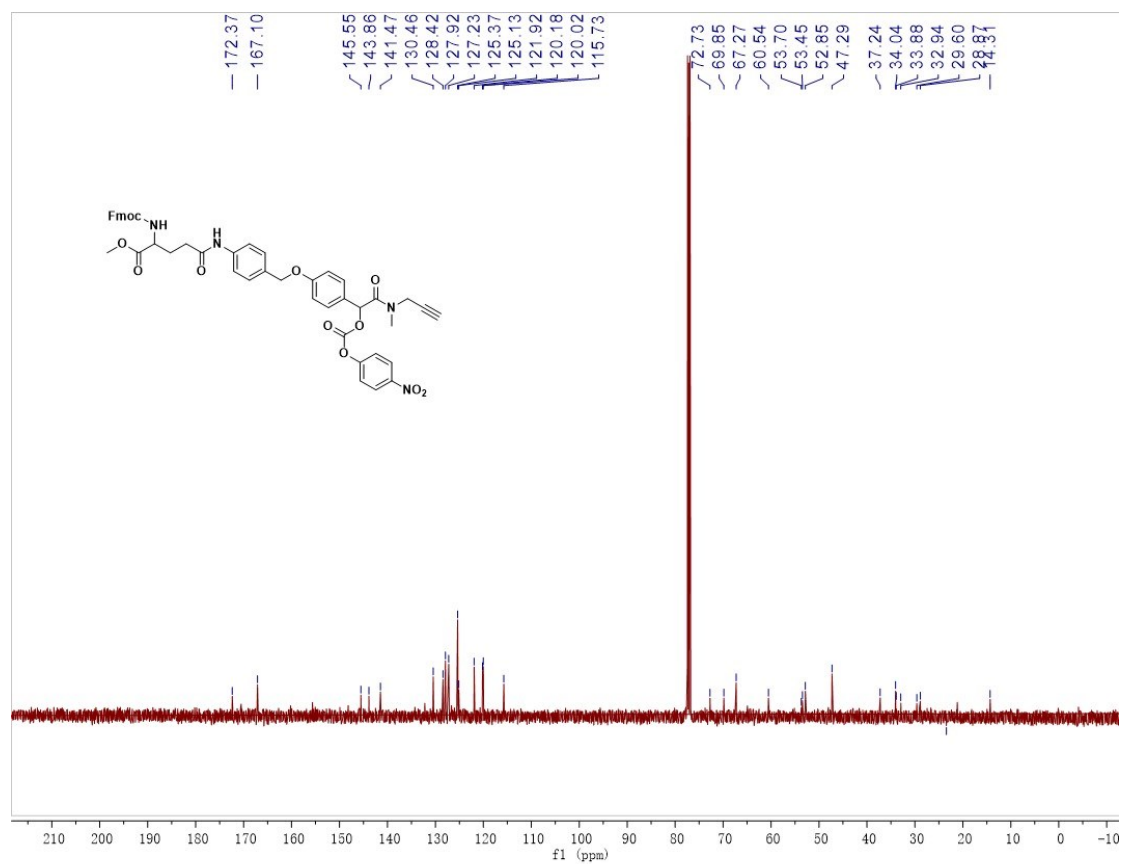

Fig. S17 <sup>13</sup>C-NMR Spectrum of compound compound 5.

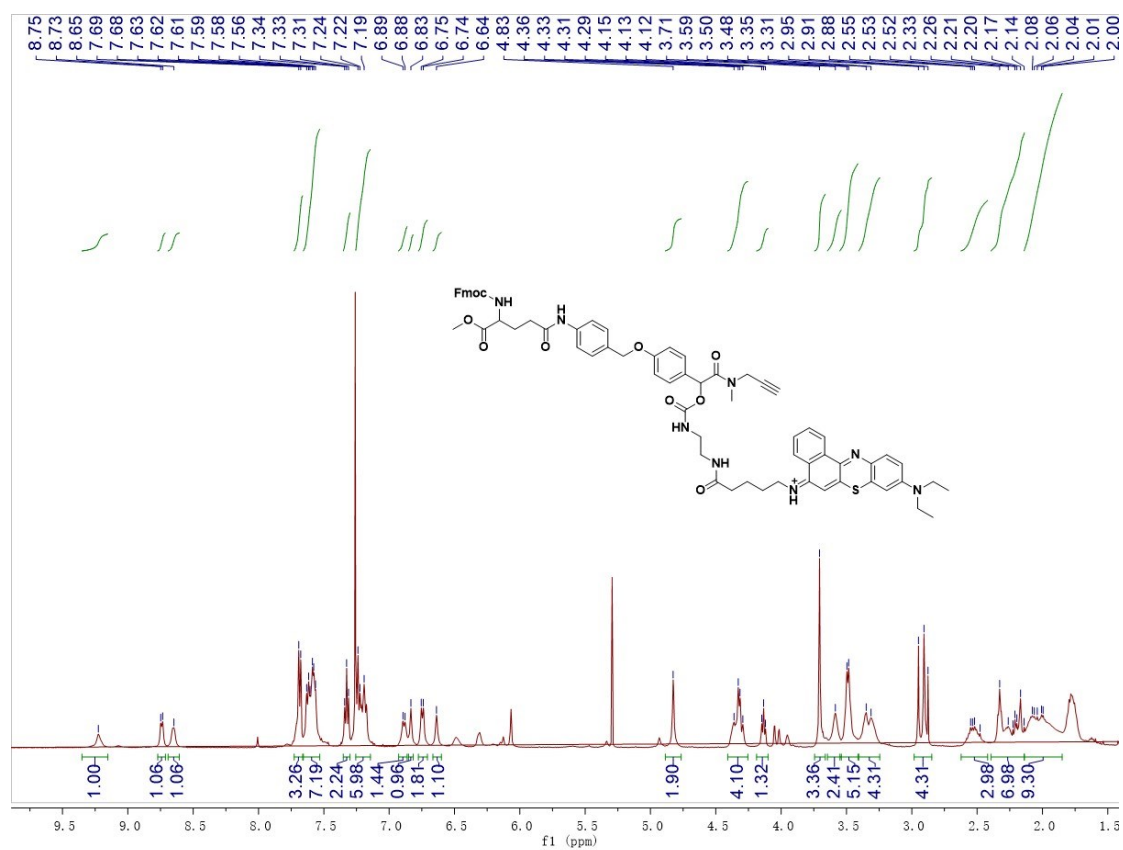

Fig. S18 <sup>1</sup>H-NMR Spectrum of compound compound 6.

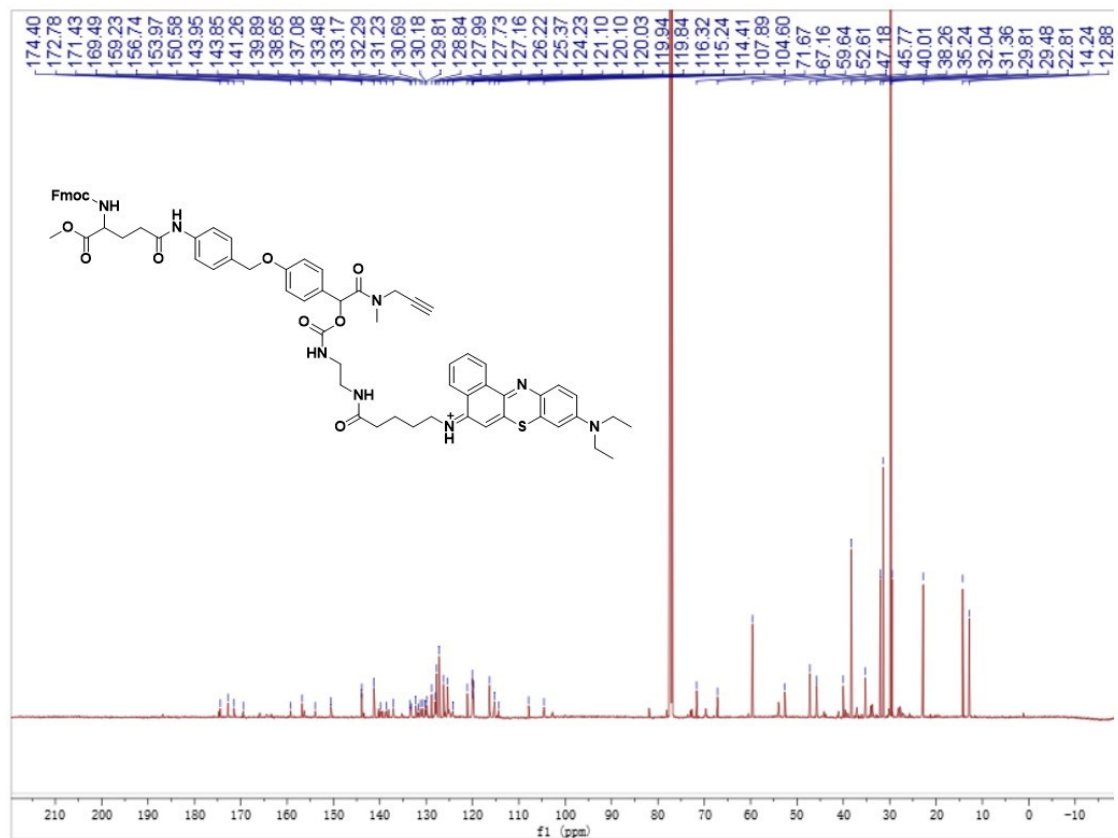

Fig. S19 <sup>13</sup>C-NMR Spectrum of compound compound 6.



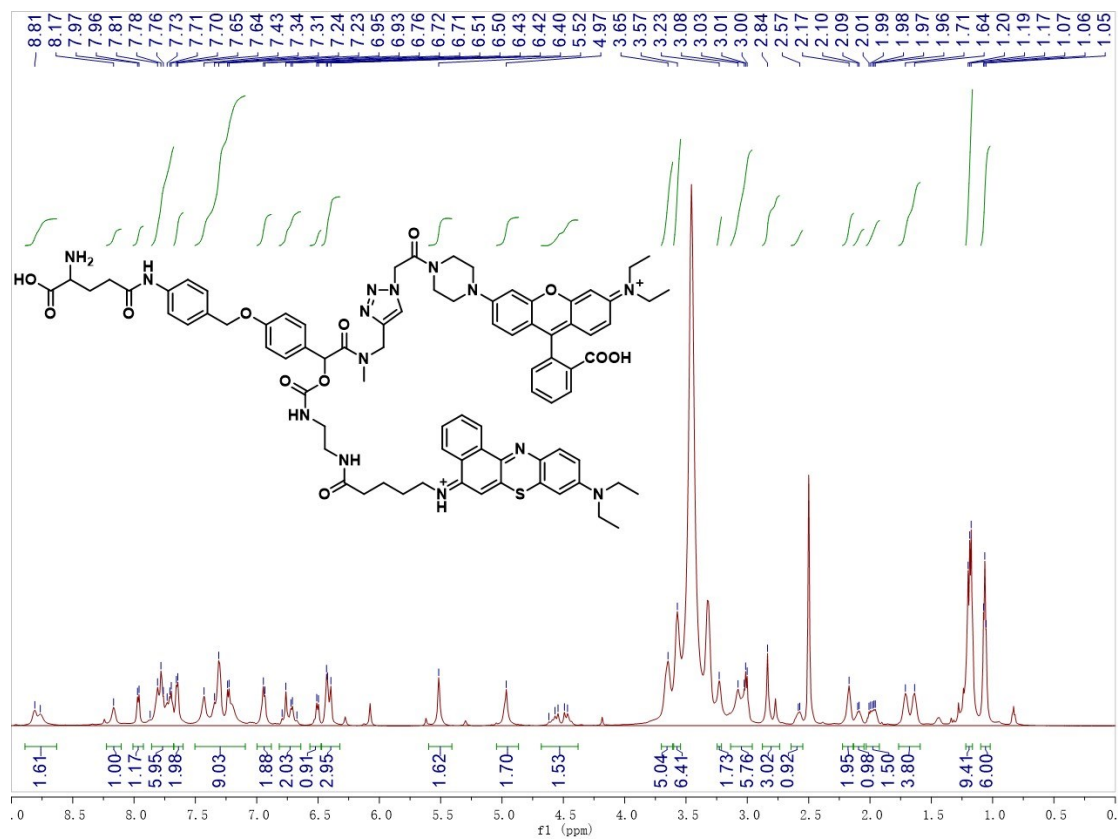

Fig. S22 <sup>1</sup>H-NMR Spectrum of compound Glu-RdEB.

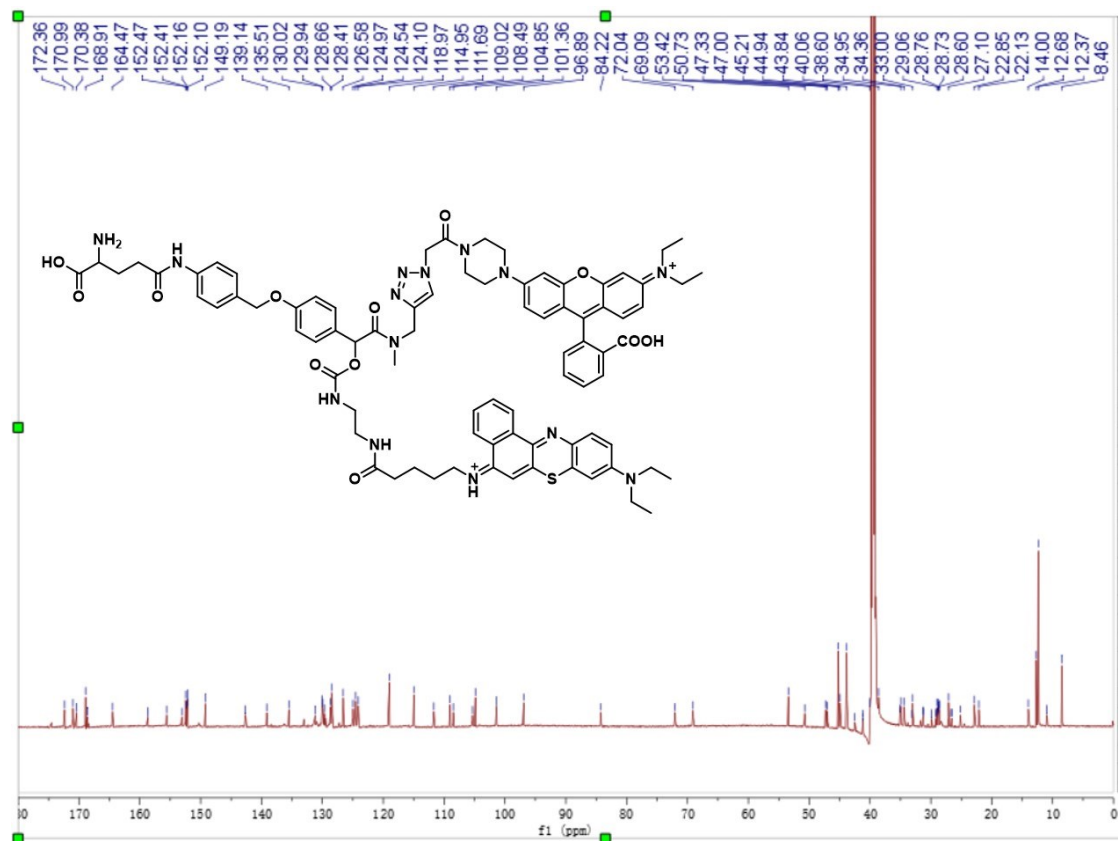

Fig. S23 <sup>13</sup>C-NMR Spectrum of compound Glu-RdEB.
